# Supplementary material for: A Protective Effect of Pirfenidone in Lung Fibroblast–Endothelial Cell Network via Inhibition of Rho-Kinase Activity
Source: MDPI journal article supplement (doi:10.3390/biomedicines11082259), 2023-08-12
Supplement: s1 [file s1]

## Supplemental Figures

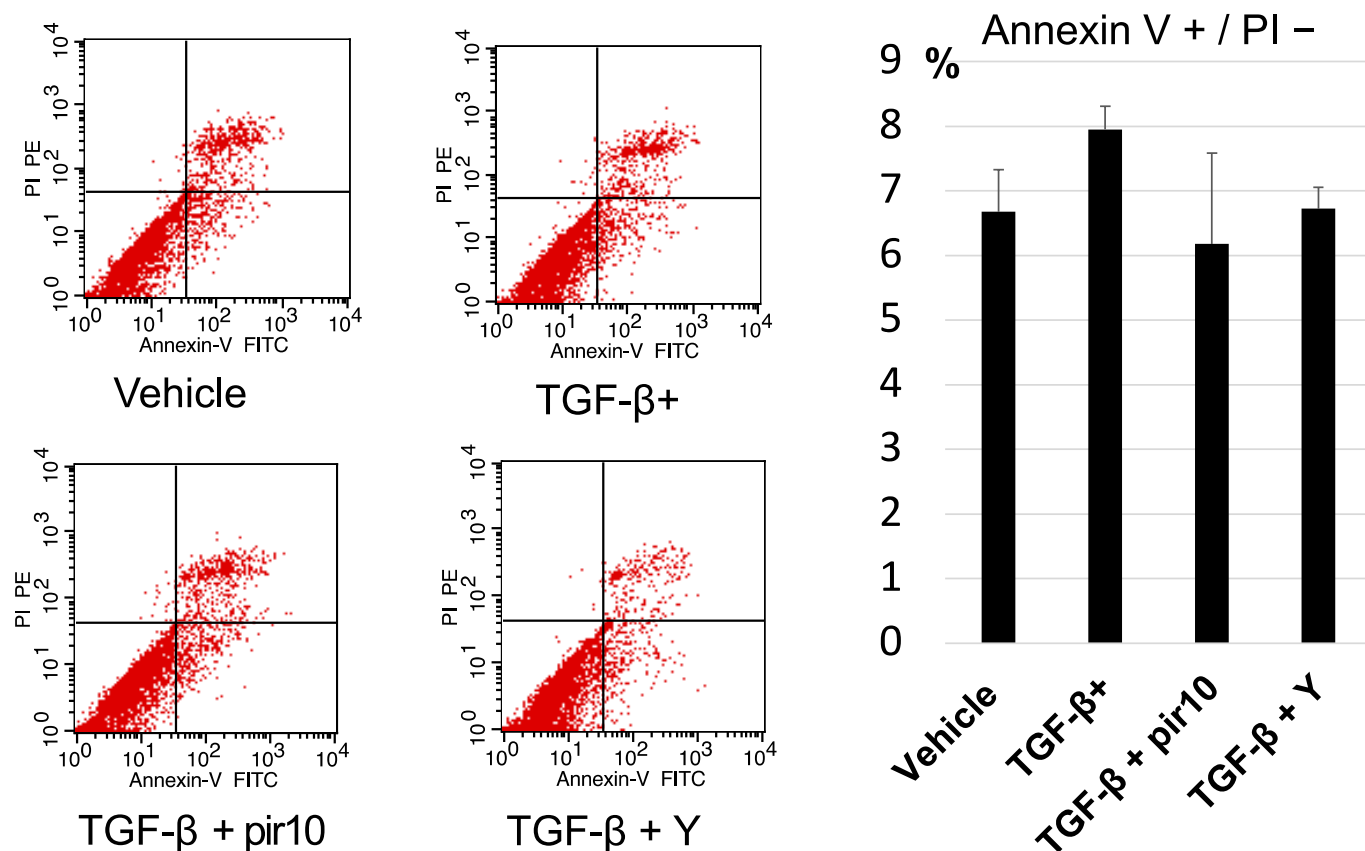

**Figure S1. Measurement of apoptosis in co-culture model.**

Co-cultured cells were stimulated overnight with TGF- $\beta$  (1.0 ng/mL), pirfenidone (10.0 mM), and Y27632 (10.0  $\mu$ M). Annexin V + /

PI - cells were measured as an apoptosis cell by flow cytometry. Data shown are mean values  $\pm$  SEM (n=3).

FITC, fluorescein isothiocyanate; PI, propidium iodide; PE, phycoerythrin; pir10, pirfenidone 10 mM; TGF- $\beta$ , transforming growth

factor  $\beta$ ; TGF- $\beta$ +, transforming growth factor  $\beta$  stimulation; Y, Y27632 (Rho-kinase inhibitor).

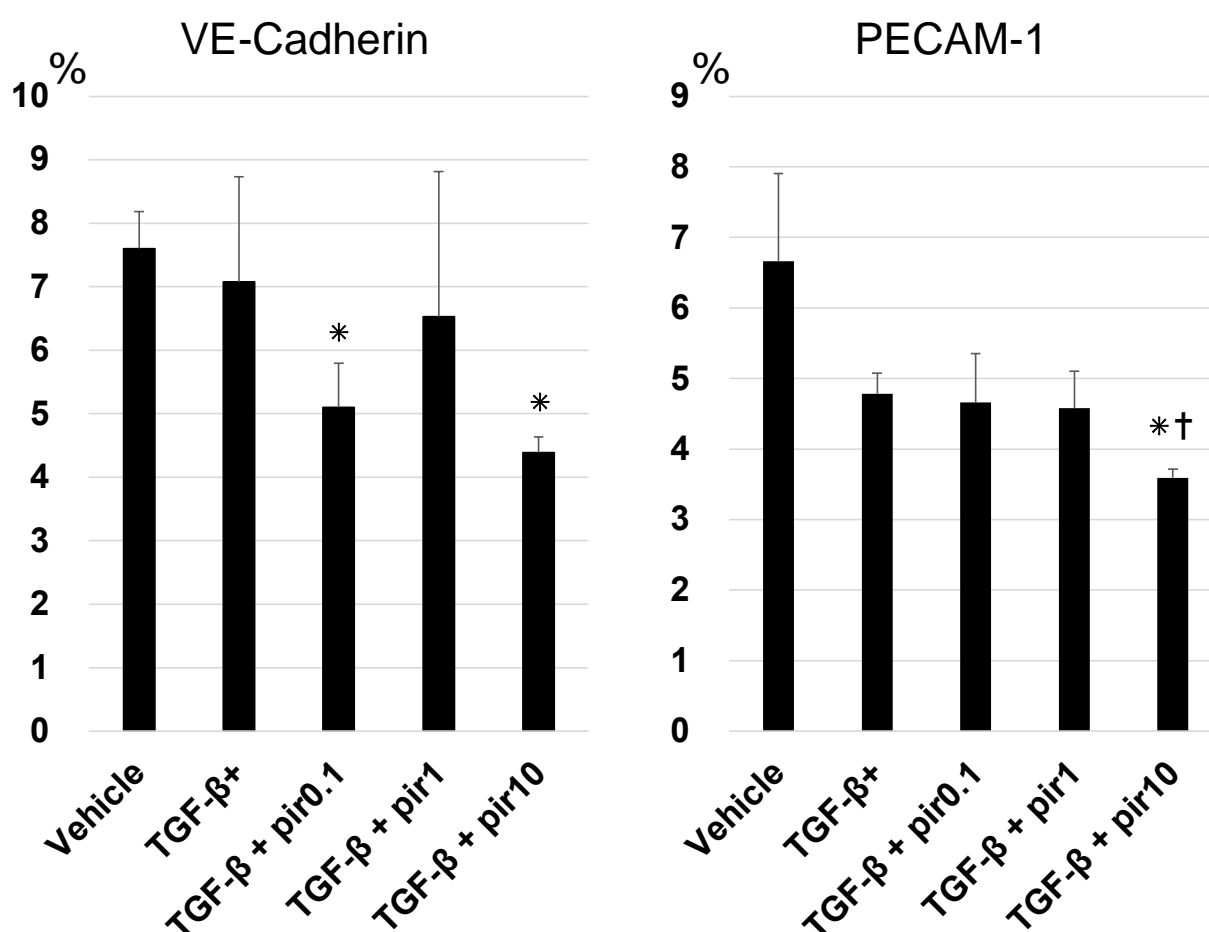

**Figure S2. Evaluation of VE-cadherin or PECAM-1 positive cell percentage during TGF-β stimulation and pirfenidone administration.**

Percentages of PECAM-1-FITC or VE-cadherin-APC positive cells to total cells in cell sheets were measured after stimulation for 24 hours with TGF-β (1.0 ng/mL) and pirfenidone (0.1-10.0 mM). Data shown are mean values  $\pm$  SEM (n = 6). \* ; versus Vehicle (p < .05), † ; versus TGF-β (p < .05). APC, allophycocyanin; VE, vascular endothelial; FITC, fluorescein isothiocyanate; PECAM-1, platelet endothelial cell adhesion molecule-1; pir0.1, pirfenidone 0.1 mM; pir1, pirfenidone 1.0 mM; pir10, pirfenidone 10.0 mM; TGF-β, transforming growth factor β; TGF-β<sup>+</sup>, transforming growth factor β stimulation.
